# Supplementary material
Source: PubMed Central journal article supplement (PMC4920292)
Supplement: rstb20150235supp1.pdf [file rstb20150235supp1.pdf]

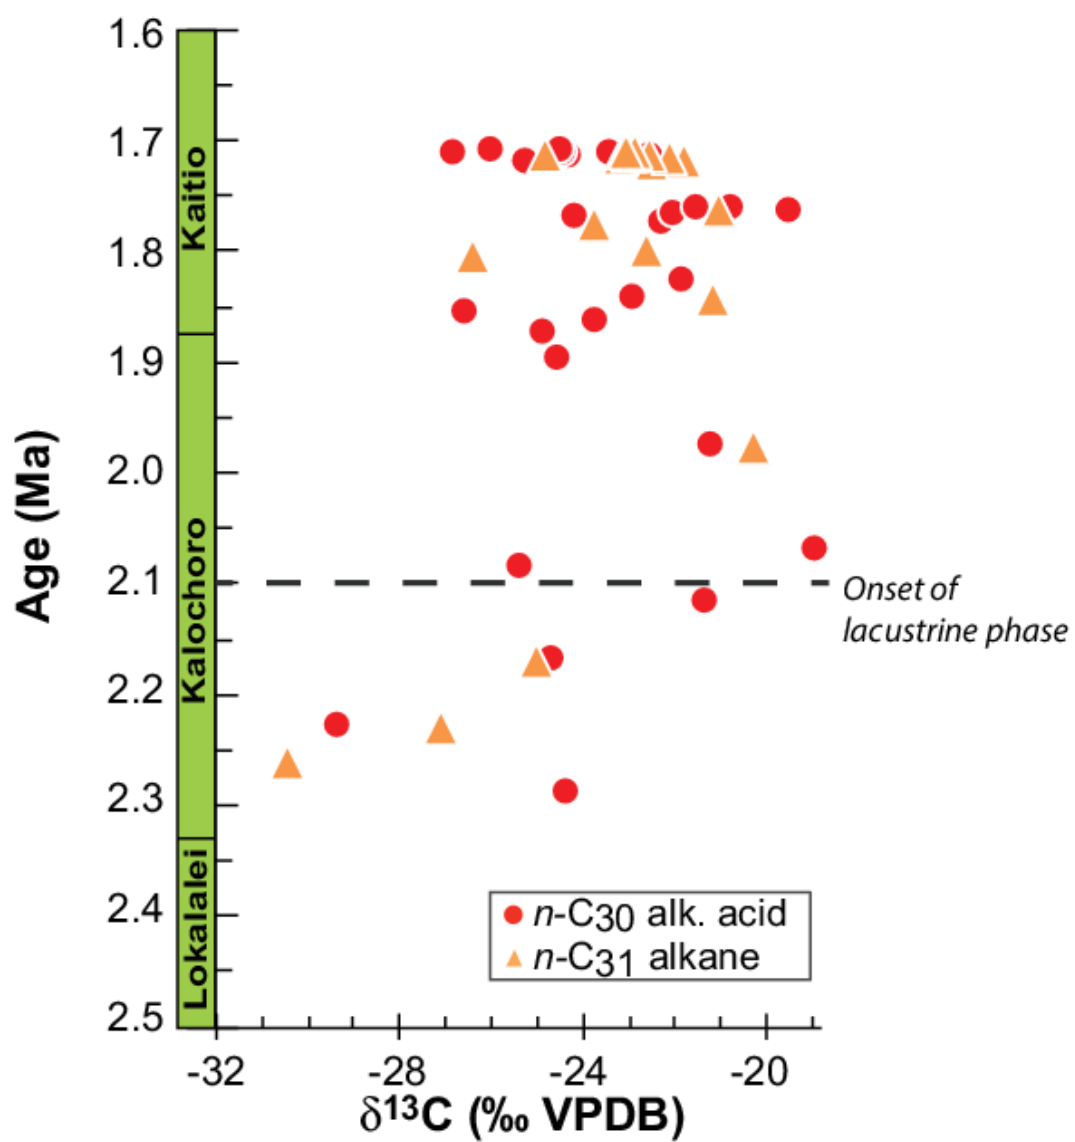

Figure S1. The  $\delta^{13}\text{C}$  values of  $n\text{-C}_{30}$  alkananoic acids and  $n\text{-C}_{31}$  alkanes versus age for Nachukui Formation samples.
